# Supplementary material for: Socioeconomic inequality shapes urban bird diversity: evidence for the luxury effect in Bogotá, Colombia
Source: Research Square preprint supplement (doi:10.21203/rs.3.rs-7716287/v1), 2025-10-03
Supplement: Supplementary file 1 [file 978d86bd4b472964bc9e88d5.xlsx]

## Sheet: Moran
Species	Test	Statistic	p-value
Turdus fuscater	Moran's I	19.9	0									1* (band (0, 6)
	Lagrange multiplier	45.678	0
	Robust Lagrange multiplier	922.748	0
	Lagrange multiplier	95.869	0
	Robust Lagrange multiplier	972.939	0
Zenaida auriculata	Moran's I	17.628	0
	Lagrange multiplier	39.844	0
	Robust Lagrange multiplier	813.344	0
	Lagrange multiplier	90.046	0
	Robust Lagrange multiplier	863.546	0
Zonotrichia capensi	Moran's I	21.979	0
	Lagrange multiplier	45.531	0
	Robust Lagrange multiplier	947.887	0
	Lagrange multiplier	79.905	0
	Robust Lagrange multiplier	982.261	0
Colibri coruscans	Moran's I	23.2765	0
	Lagrange multiplier	10.0612	0.00151426
	Robust Lagrange multiplier	685.544	4.16e-151
	Lagrange multiplier	23.0639	1.567e-06
	Robust Lagrange multiplier	698.546	6.19e-154
Troglodytes musculu	Moran's I	18.2871	0
	Lagrange multiplier	4.64144	0.0312088
	Robust Lagrange multiplier	328.986	1.598e-73
	Lagrange multiplier	11.6312	0.00064853
	Robust Lagrange multiplier	335.976	4.801e-75
Tyrannus melancholi	Moran's I	21.9549	0
	Lagrange multiplier	4.0227	0.0448918
	Robust Lagrange multiplier	337.652	2.072e-75
	Lagrange multiplier	8.93933	0.00279095
	Robust Lagrange multiplier	342.568	1.76e-76
Molothrus bonariens	Moran's I	14.8592	0
	Lagrange multiplier	10.3107	0.00132263
	Robust Lagrange multiplier	327.518	3.336e-73
	Lagrange multiplier	22.9109	1.697e-06
	Robust Lagrange multiplier	340.119	6.012e-76
Orochelidon murina	Moran's I	11.6562	0
	Lagrange multiplier	14.6224	0.00013135
	Robust Lagrange multiplier	240.27	3.434e-54
	Lagrange multiplier	40.408	2.061e-10
	Robust Lagrange multiplier	266.056	8.215e-60
Coragyps atratus	Moran's I	13.1282	0
	Lagrange multiplier	32.458	1.218e-08
	Robust Lagrange multiplier	402.451	1.612e-89
	Lagrange multiplier	64.0424	1.218e-15
	Robust Lagrange multiplier	434.036	2.15e-96
Vanellus chilensis	Moran's I	11.7317	0
	Lagrange multiplier	24.6019	7.04836e-07
	Robust Lagrange multiplier	253.282	4.99929e-57
	Lagrange multiplier	47.6411	5.11844e-12
	Robust Lagrange multiplier	276.321	4.75598e-62
Diglossa humeralis	Moran's I	17.4336	0
	Lagrange multiplier	3.92049	0.047701
	Robust Lagrange multiplier	221.889	3.50288e-50
	Lagrange multiplier	9.07622	0.00258955
	Robust Lagrange multiplier	227.044	2.62983e-51
Icterus chrysater	Moran's I	20.0212	0
	Lagrange multiplier	1.81986	0.17733
	Robust Lagrange multiplier	163.013	2.48507e-37
	Lagrange multiplier	4.55641	0.0327958
	Robust Lagrange multiplier	165.75	6.27383e-38
Spinus psaltria	Moran's I	14.8422	0
	Lagrange multiplier	3.12736	0.0769882
	Robust Lagrange multiplier	150.248	1.53048e-34
	Lagrange multiplier	7.90873	0.00491968
	Robust Lagrange multiplier	155.029	1.37991e-35
Phimosus infuscatus	Moran's I	6.71781	1.84481e-11
	Lagrange multiplier	39.802	2.81055e-10
	Robust Lagrange multiplier	137.852	7.85234e-32
	Lagrange multiplier	106.347	6.18924e-25
	Robust Lagrange multiplier	204.397	2.29305e-46
Piranga rubra	Moran's I	16.9816	0
	Lagrange multiplier	3.16665	0.0751566
	Robust Lagrange multiplier	161.017	6.78404e-37
	Lagrange multiplier	6.40839	0.0113582
	Robust Lagrange multiplier	164.259	1.32824e-37
Fulica americana	Moran's I	5.56387	2.63861e-08
	Lagrange multiplier	21.4031	3.7217e-06
	Robust Lagrange multiplier	68.0422	1.60031e-16
	Lagrange multiplier	74.2938	6.73133e-18
	Robust Lagrange multiplier	120.933	3.95264e-28
Contopus virens	Moran's I	10.3127	0
	Lagrange multiplier	24.2776	8.34015e-07
	Robust Lagrange multiplier	218.488	1.9331e-49
	Lagrange multiplier	47.3756	5.86074e-12
	Robust Lagrange multiplier	241.586	1.77402e-54
Ardea ibis	Moran's I	7.9741	1.55431e-15
	Lagrange multiplier	34.1093	5.21012e-09
	Robust Lagrange multiplier	157.045	5.00457e-36
	Lagrange multiplier	70.2738	5.16195e-17
	Robust Lagrange multiplier	193.209	6.3366e-44
Gallinula galeata	Moran's I	6.20254	5.55594e-10
	Lagrange multiplier	12.8972	0.000329075
	Robust Lagrange multiplier	63.945	1.27939e-15
	Lagrange multiplier	37.3247	1.00012e-09
	Robust Lagrange multiplier	88.3725	5.42191e-21
Setophaga fusca	Moran's I	10.7008	0
	Lagrange multiplier	59.3663	1.30892e-14
	Robust Lagrange multiplier	237.093	1.69286e-53
	Lagrange multiplier	99.319	2.14933e-23
	Robust Lagrange multiplier	277.046	3.30703e-62
Ardea alba	Moran's I	12.7797	0
	Lagrange multiplier	2.5644	0.109294
	Robust Lagrange multiplier	72.8868	1.37301e-17
	Lagrange multiplier	4.65543	0.0309554
	Robust Lagrange multiplier	74.9779	4.76021e-18
Elaenia frantzii	Moran's I	13.9438	0
	Lagrange multiplier	1.45508	0.227714
	Robust Lagrange multiplier	60.262	8.30362e-15
	Lagrange multiplier	3.11285	0.077677
	Robust Lagrange multiplier	61.9197	3.57746e-15
Diglossa sittoides	Moran's I	16.3001	0
	Lagrange multiplier	1.3876	0.238811
	Robust Lagrange multiplier	99.4868	1.97472e-23
	Lagrange multiplier	3.32796	0.0681115
	Robust Lagrange multiplier	101.427	7.4139e-24
Mecocerculus leucop	Moran's I	12.7663	0
	Lagrange multiplier	1.70721	0.191348
	Robust Lagrange multiplier	95.8189	1.25887e-22
	Lagrange multiplier	4.8192	0.0281445
	Robust Lagrange multiplier	98.9309	2.61466e-23
Thraupis episcopus	Moran's I	16.2396	0
	Lagrange multiplier	1.77324	0.182982
	Robust Lagrange multiplier	126.729	2.12983e-29
	Lagrange multiplier	4.92947	0.0264024
	Robust Lagrange multiplier	129.885	4.34226e-30
Conirostrum rufum	Moran's I	12.7279	0
	Lagrange multiplier	1.56568	0.210835
	Robust Lagrange multiplier	70.1336	5.54218e-17
	Lagrange multiplier	4.4655	0.0345859
	Robust Lagrange multiplier	73.0334	1.27475e-17
Chrysomus icterocep	Moran's I	6.46923	9.85063e-11
	Lagrange multiplier	9.76899	0.0017748
	Robust Lagrange multiplier	78.864	6.65364e-19
	Lagrange multiplier	27.096	1.936e-07
	Robust Lagrange multiplier	96.191	1.04319e-22
Rupornis magnirostr	Moran's I	18.6728	0
	Lagrange multiplier	0.947579	0.330336
	Robust Lagrange multiplier	120.667	4.52047e-28
	Lagrange multiplier	2.95373	0.0856798
	Robust Lagrange multiplier	122.673	1.64449e-28
Porphyrio martinica	Moran's I	9.80673	0
	Lagrange multiplier	3.6188	0.0571299
	Robust Lagrange multiplier	119.717	7.29695e-28
	Lagrange multiplier	10.2449	0.00137064
	Robust Lagrange multiplier	126.343	2.58697e-29
Spinus spinescens	Moran's I	10.2695	0
	Lagrange multiplier	1.13374	0.286978
	Robust Lagrange multiplier	46.3008	1.01425e-11
	Lagrange multiplier	3.09863	0.0783582
	Robust Lagrange multiplier	48.2656	3.72218e-12
Mimus gilvus	Moran's I	16.8987	0
	Lagrange multiplier	3.31809	0.0685215
	Robust Lagrange multiplier	161.032	6.73247e-37
	Lagrange multiplier	7.31849	0.00682488
	Robust Lagrange multiplier	165.032	8.99981e-38
Elanus leucurus	Moran's I	17.5525	0
	Lagrange multiplier	1.96868	0.160588
	Robust Lagrange multiplier	147.115	7.40713e-34
	Lagrange multiplier	4.86402	0.0274223
	Robust Lagrange multiplier	150.01	1.72487e-34
Vireo olivaceus	Moran's I	8.70565	0
	Lagrange multiplier	20.4289	6.18877e-06
	Robust Lagrange multiplier	121.926	2.39665e-28
	Lagrange multiplier	36.4674	1.55242e-09
	Robust Lagrange multiplier	137.964	7.42093e-32
Podilymbus podiceps	Moran's I	7.98378	1.33227e-15
	Lagrange multiplier	27.0504	1.98223e-07
	Robust Lagrange multiplier	82.4705	1.07262e-19
	Lagrange multiplier	53.8518	2.16194e-13
	Robust Lagrange multiplier	109.272	1.41483e-25
Thraupis palmarum	Moran's I	12.8364	0
	Lagrange multiplier	1.46776	0.225699
	Robust Lagrange multiplier	70.4182	4.79743e-17
	Lagrange multiplier	3.76025	0.0524847
	Robust Lagrange multiplier	72.7107	1.50115e-17
Catharus ustulatus	Moran's I	8.59125	0
	Lagrange multiplier	9.40113	0.00216851
	Robust Lagrange multiplier	131.155	2.29023e-30
	Lagrange multiplier	24.3265	8.13111e-07
	Robust Lagrange multiplier	146.08	1.24679e-33
Oxyura ferruginea	Moran's I	4.89465	9.84798e-07
	Lagrange multiplier	42.426	7.3409e-11
	Robust Lagrange multiplier	62.1491	3.18419e-15
	Lagrange multiplier	100.301	1.30899e-23
	Robust Lagrange multiplier	120.024	6.24911e-28
Spatula discors	Moran's I	4.03639	5.42789e-05
	Lagrange multiplier	5.95868	0.014645
	Robust Lagrange multiplier	34.6764	3.89317e-09
	Lagrange multiplier	31.5409	1.95286e-08
	Robust Lagrange multiplier	60.2586	8.31774e-15
Synallaxis subpudic	Moran's I	7.84216	4.44089e-15
	Lagrange multiplier	6.83083	0.00895976
	Robust Lagrange multiplier	76.3969	2.32014e-18
	Lagrange multiplier	17.6271	2.68736e-05
	Robust Lagrange multiplier	87.1931	9.84243e-21
Piranga olivacea	Moran's I	10.0089	0
	Lagrange multiplier	6.46939	0.0109748
	Robust Lagrange multiplier	118.625	1.26536e-27
	Lagrange multiplier	15.3028	9.15803e-05
	Robust Lagrange multiplier	127.458	1.47472e-29
Buteo platypterus	Moran's I	15.3448	0
	Lagrange multiplier	1.64587	0.199522
	Robust Lagrange multiplier	63.8553	1.339e-15
	Lagrange multiplier	2.17692	0.140095
	Robust Lagrange multiplier	64.3864	1.02262e-15
Pyrocephalus rubinu	Moran's I	11.1874	0
	Lagrange multiplier	3.61118	0.0573924
	Robust Lagrange multiplier	83.783	5.52171e-20
	Lagrange multiplier	9.10996	0.00254222
	Robust Lagrange multiplier	89.2818	3.42395e-21
Tringa solitaria	Moran's I	6.95432	3.5425e-12
	Lagrange multiplier	3.1998	0.0736471
	Robust Lagrange multiplier	69.4234	7.94413e-17
	Lagrange multiplier	9.64735	0.00189625
	Robust Lagrange multiplier	75.8709	3.02826e-18
Butorides striata	Moran's I	10.5535	0
	Lagrange multiplier	1.29698	0.254766
	Robust Lagrange multiplier	57.6467	3.13683e-14
	Lagrange multiplier	3.58547	0.0582869
	Robust Lagrange multiplier	59.9352	9.80312e-15
Tyrannus tyrannus	Moran's I	5.58607	2.32264e-08
	Lagrange multiplier	46.448	9.40805e-12
	Robust Lagrange multiplier	83.1393	7.64715e-20
	Lagrange multiplier	88.9731	4.00218e-21
	Robust Lagrange multiplier	125.664	3.64152e-29
Setophaga petechia	Moran's I	10.8912	0
	Lagrange multiplier	15.8665	6.79718e-05
	Robust Lagrange multiplier	116.583	3.54258e-27
	Lagrange multiplier	28.1379	1.12974e-07
	Robust Lagrange multiplier	128.854	7.29846e-30
Nycticorax nycticor	Moran's I	8.02089	1.11022e-15
	Lagrange multiplier	2.04331	0.152877
	Robust Lagrange multiplier	43.585	4.05947e-11
	Lagrange multiplier	5.3848	0.0203129
	Robust Lagrange multiplier	46.9265	7.37012e-12
Sturnella magna	Moran's I	9.10912	0
	Lagrange multiplier	1.47389	0.224733
	Robust Lagrange multiplier	47.538	5.39483e-12
	Lagrange multiplier	4.3927	0.0360932
	Robust Lagrange multiplier	50.4568	1.21817e-12
Quiscalus lugubris	Moran's I	6.44131	1.18448e-10
	Lagrange multiplier	7.96318	0.00477385
	Robust Lagrange multiplier	48.5522	3.21611e-12
	Lagrange multiplier	20.2371	6.84133e-06
	Robust Lagrange multiplier	60.8261	6.23448e-15
Leiothlypis peregri	Moran's I	7.50396	6.19504e-14
	Lagrange multiplier	15.1985	9.67801e-05
	Robust Lagrange multiplier	75.7868	3.16004e-18
	Lagrange multiplier	29.1296	6.76954e-08
	Robust Lagrange multiplier	89.7179	2.74659e-21
Nannopterum brasili	Moran's I	4.33436	1.46184e-05
	Lagrange multiplier	2.51323	0.112894
	Robust Lagrange multiplier	12.6012	0.00038549
	Lagrange multiplier	7.55619	0.00598044
	Robust Lagrange multiplier	17.6442	2.66325e-05
Coccyzus americanus	Moran's I	10.5028	0
	Lagrange multiplier	2.03721	0.153491
	Robust Lagrange multiplier	71.2296	3.17984e-17
	Lagrange multiplier	4.63773	0.0312764
	Robust Lagrange multiplier	73.8301	8.51381e-18
Forpus conspicillat	Moran's I	6.21062	5.27743e-10
	Lagrange multiplier	2.19219	0.138712
	Robust Lagrange multiplier	32.5667	1.15169e-08
	Lagrange multiplier	7.90098	0.00494081
	Robust Lagrange multiplier	38.2755	6.14287e-10
Pheucticus aureoven	Moran's I	11.9947	0
	Lagrange multiplier	1.31166	0.252094
	Robust Lagrange multiplier	47.8951	4.49648e-12
	Lagrange multiplier	3.09296	0.0786319
	Robust Lagrange multiplier	49.6764	1.81316e-12
Chaetocercus mulsan	Moran's I	15.0297	0
	Lagrange multiplier	1.03704	0.308511
	Robust Lagrange multiplier	52.9462	3.4281e-13
	Lagrange multiplier	2.55492	0.109951
	Robust Lagrange multiplier	54.4641	1.58315e-13
Actitis macularius	Moran's I	7.27415	3.4861e-13
	Lagrange multiplier	2.57077	0.108855
	Robust Lagrange multiplier	26.5232	2.60395e-07
	Lagrange multiplier	6.17555	0.0129527
	Robust Lagrange multiplier	30.128	4.04456e-08
Parkesia noveborace	Moran's I	8.01788	1.11022e-15
	Lagrange multiplier	0.579817	0.446384
	Robust Lagrange multiplier	27.1377	1.8947e-07
	Lagrange multiplier	1.8306	0.176056
	Robust Lagrange multiplier	28.3885	9.92557e-08
Contopus cooperi	Moran's I	11.0005	0
	Lagrange multiplier	0.692795	0.405215
	Robust Lagrange multiplier	28.7111	8.40188e-08
	Lagrange multiplier	1.6109	0.204365
	Robust Lagrange multiplier	29.6293	5.23096e-08
Setophaga ruticilla	Moran's I	9.24403	0
	Lagrange multiplier	1.47773	0.224129
	Robust Lagrange multiplier	40.468	1.99859e-10
	Lagrange multiplier	3.70742	0.0541712
	Robust Lagrange multiplier	42.6977	6.38869e-11
Cardellina canadens	Moran's I	9.3627	0
	Lagrange multiplier	1.01847	0.312882
	Robust Lagrange multiplier	29.1368	6.74454e-08
	Lagrange multiplier	3.02207	0.0821386
	Robust Lagrange multiplier	31.1403	2.4003e-08
Tringa flavipes	Moran's I	4.04971	5.12808e-05
	Lagrange multiplier	1.42921	0.231894
	Robust Lagrange multiplier	13.8203	0.000201152
	Lagrange multiplier	3.99139	0.0457334
	Robust Lagrange multiplier	16.3825	5.17617e-05
Crotophaga major	Moran's I	9.38551	0
	Lagrange multiplier	0.600647	0.438331
	Robust Lagrange multiplier	9.03593	0.00264725
	Lagrange multiplier	0.978236	0.322635
	Robust Lagrange multiplier	9.41351	0.00215392
Tyrannus savana	Moran's I	6.61005	3.84177e-11
	Lagrange multiplier	1.60465	0.205246
	Robust Lagrange multiplier	19.8978	8.16955e-06
	Lagrange multiplier	3.63299	0.0566449
	Robust Lagrange multiplier	21.9261	2.83351e-06
Icterus icterus	Moran's I	10.9247	0
	Lagrange multiplier	0.636328	0.425044
	Robust Lagrange multiplier	19.5818	9.63812e-06
	Lagrange multiplier	1.43565	0.230844
	Robust Lagrange multiplier	20.3812	6.34513e-06
Icterus nigrogulari	Moran's I	12.4393	0
	Lagrange multiplier	0.376291	0.539595
	Robust Lagrange multiplier	9.21834	0.00239602
	Lagrange multiplier	0.660527	0.416374
	Robust Lagrange multiplier	9.50258	0.00205183
Myiodynastes luteiv	Moran's I	9.79642	0
	Lagrange multiplier	0.698674	0.40323
	Robust Lagrange multiplier	33.172	8.43555e-09
	Lagrange multiplier	2.09976	0.147322
	Robust Lagrange multiplier	34.5731	4.10539e-09
Sicalis flaveola	Moran's I	10.223	0
	Lagrange multiplier	0.59182	0.441716
	Robust Lagrange multiplier	8.49674	0.00355783
	Lagrange multiplier	1.15005	0.283538
	Robust Lagrange multiplier	9.05498	0.00261981
Colibri cyanotus	Moran's I	12.8867	0
	Lagrange multiplier	0.853873	0.355459
	Robust Lagrange multiplier	35.7403	2.25454e-09
	Lagrange multiplier	1.73205	0.188149
	Robust Lagrange multiplier	36.6185	1.43665e-09
Lesbia nuna	Moran's I	12.5294	0
	Lagrange multiplier	0.6087	0.435278
	Robust Lagrange multiplier	23.9356	9.96108e-07
	Lagrange multiplier	1.20816	0.271697
	Robust Lagrange multiplier	24.5351	7.29687e-07
Dendrocygna autumna	Moran's I	3.16254	0.00156398
	Lagrange multiplier	4.96542	0.025859
	Robust Lagrange multiplier	8.23427	0.00411067
	Lagrange multiplier	16.1732	5.78054e-05
	Robust Lagrange multiplier	19.4421	1.03697e-05
Mniotilta varia	Moran's I	10.4362	0
	Lagrange multiplier	0.64103	0.423338
	Robust Lagrange multiplier	23.8674	1.03205e-06
	Lagrange multiplier	1.81251	0.178207
	Robust Lagrange multiplier	25.0389	5.61857e-07
Pandion haliaetus	Moran's I	12.7147	0
	Lagrange multiplier	0.517787	0.471787
	Robust Lagrange multiplier	21.4469	3.63757e-06
	Lagrange multiplier	1.35771	0.243934
	Robust Lagrange multiplier	22.2869	2.34808e-06
Rallus semiplumbeus	Moran's I	4.79348	1.63911e-06
	Lagrange multiplier	2.38919	0.122177
	Robust Lagrange multiplier	14.5236	0.000138416
	Lagrange multiplier	8.75838	0.00308183
	Robust Lagrange multiplier	20.8928	4.85723e-06
Diglossa cyanea	Moran's I	9.16502	0
	Lagrange multiplier	1.34289	0.246525
	Robust Lagrange multiplier	29.9885	4.34622e-08
	Lagrange multiplier	3.30914	0.0688957
	Robust Lagrange multiplier	31.9547	1.57809e-08
Anisognathus ignive	Moran's I	8.78549	0
	Lagrange multiplier	0.536735	0.463789
	Robust Lagrange multiplier	0.0290446	0.864676
	Lagrange multiplier	0.561743	0.453559
	Robust Lagrange multiplier	0.0540518	0.816157
Asio stygius	Moran's I	21.8452	0
	Lagrange multiplier	0.727772	0.393606
	Robust Lagrange multiplier	34.8297	3.59851e-09
	Lagrange multiplier	1.5493	0.213239
	Robust Lagrange multiplier	35.6512	2.36005e-09
Porphyriops melanop	Moran's I	4.26171	2.02866e-05
	Lagrange multiplier	0.817194	0.366002
	Robust Lagrange multiplier	4.20965	0.0401945
	Lagrange multiplier	3.75233	0.0527341
	Robust Lagrange multiplier	7.14479	0.00751822
Tringa melanoleuca	Moran's I	3.74725	0.000178786
	Lagrange multiplier	2.09519	0.147763
	Robust Lagrange multiplier	14.9578	0.000109941
	Lagrange multiplier	5.95597	0.0146676
	Robust Lagrange multiplier	18.8186	1.43759e-05
Vireo flavoviridis	Moran's I	7.37776	1.60982e-13
	Lagrange multiplier	0.940412	0.332172
	Robust Lagrange multiplier	5.50954	0.018913
	Lagrange multiplier	1.53721	0.215033
	Robust Lagrange multiplier	6.10634	0.0134698
Systellura longiros	Moran's I	11.3706	0
	Lagrange multiplier	2.4965	0.1141
	Robust Lagrange multiplier	42.3655	7.57132e-11
	Lagrange multiplier	4.82782	0.028004
	Robust Lagrange multiplier	44.6968	2.30028e-11
Sicalis luteola	Moran's I	4.51117	6.44697e-06
	Lagrange multiplier	0.517578	0.471877
	Robust Lagrange multiplier	5.11571	0.0237101
	Lagrange multiplier	1.26581	0.260554
	Robust Lagrange multiplier	5.86395	0.0154541
Asio clamator	Moran's I	8.96343	0
	Lagrange multiplier	0.76576	0.381532
	Robust Lagrange multiplier	32.6359	1.11141e-08
	Lagrange multiplier	2.4892	0.11463
	Robust Lagrange multiplier	34.3594	4.58186e-09
Grallaria ruficapil	Moran's I	12.2617	0
	Lagrange multiplier	0.733608	0.391716
	Robust Lagrange multiplier	4.12427	0.0422723
	Lagrange multiplier	1.03774	0.308348
	Robust Lagrange multiplier	4.4284	0.0353457
Lesbia victoriae	Moran's I	13.7015	0
	Lagrange multiplier	0.464795	0.495391
	Robust Lagrange multiplier	1.57623	0.209304
	Lagrange multiplier	0.546288	0.459838
	Robust Lagrange multiplier	1.65773	0.197911
Sayornis nigricans	Moran's I	10.4279	0
	Lagrange multiplier	0.41095	0.521488
	Robust Lagrange multiplier	4.20924	0.0402044
	Lagrange multiplier	0.659	0.416913
	Robust Lagrange multiplier	4.45729	0.0347527
Ramphocelus dimidia	Moran's I	7.46385	8.39329e-14
	Lagrange multiplier	1.63193	0.201436
	Robust Lagrange multiplier	17.5635	2.77875e-05
	Lagrange multiplier	4.24266	0.0394204
	Robust Lagrange multiplier	20.1742	7.07e-06
Pitangus sulphuratu	Moran's I	9.67902	0
	Lagrange multiplier	0.416043	0.518918
	Robust Lagrange multiplier	3.58838	0.0581851
	Lagrange multiplier	0.609415	0.435008
	Robust Lagrange multiplier	3.78175	0.0518145
Pheucticus ludovici	Moran's I	6.95083	3.63132e-12
	Lagrange multiplier	1.0581	0.303649
	Robust Lagrange multiplier	13.5228	0.000235688
	Lagrange multiplier	2.3031	0.129116
	Robust Lagrange multiplier	14.7678	0.000121597
Riparia riparia	Moran's I	4.10157	4.10352e-05
	Lagrange multiplier	0.626159	0.428768
	Robust Lagrange multiplier	4.72197	0.0297797
	Lagrange multiplier	1.72365	0.189223
	Robust Lagrange multiplier	5.81946	0.0158498
Cissopis leverianus	Moran's I	14.9895	0
	Lagrange multiplier	0.449969	0.50235
	Robust Lagrange multiplier	3.55766	0.0592711
	Lagrange multiplier	0.807936	0.368731
	Robust Lagrange multiplier	3.91563	0.0478391
Hirundo rustica	Moran's I	6.28767	3.22268e-10
	Lagrange multiplier	0.578461	0.446916
	Robust Lagrange multiplier	5.58588	0.0181058
	Lagrange multiplier	1.0589	0.303467
	Robust Lagrange multiplier	6.06631	0.0137784
Contopus sordidulus	Moran's I	6.99368	2.67764e-12
	Lagrange multiplier	0.815241	0.366575
	Robust Lagrange multiplier	11.7506	0.000608229
	Lagrange multiplier	1.88923	0.169289
	Robust Lagrange multiplier	12.8246	0.000342089
Petrochelidon pyrrh	Moran's I	2.55193	0.0107127
	Lagrange multiplier	1.30009	0.254197
	Robust Lagrange multiplier	1.02502	0.311331
	Lagrange multiplier	4.4198	0.0355242
	Robust Lagrange multiplier	4.14474	0.0417642
Metallura tyrianthi	Moran's I	10.3584	0
	Lagrange multiplier	0.483857	0.48668
	Robust Lagrange multiplier	1.1815	0.27705
	Lagrange multiplier	0.598101	0.439304
	Robust Lagrange multiplier	1.29575	0.254992
Dryobates fumigatus	Moran's I	5.7315	9.95478e-09
	Lagrange multiplier	2.07842	0.149395
	Robust Lagrange multiplier	12.0052	0.000530531
	Lagrange multiplier	5.18565	0.0227742
	Robust Lagrange multiplier	15.1124	0.000101296
Empidonax virescens	Moran's I	9.63334	0
	Lagrange multiplier	0.470444	0.492783
	Robust Lagrange multiplier	6.68398	0.00972829
	Lagrange multiplier	0.874865	0.349612
	Robust Lagrange multiplier	7.08841	0.00775842
Diglossa albilatera	Moran's I	7.08035	1.43796e-12
	Lagrange multiplier	1.29258	0.255573
	Robust Lagrange multiplier	24.5484	7.24667e-07
	Lagrange multiplier	3.38128	0.0659407
	Robust Lagrange multiplier	26.6371	2.45485e-07
Patagioenas fasciat	Moran's I	10.0126	0
	Lagrange multiplier	0.492374	0.48287
	Robust Lagrange multiplier	6.39168e-05	0.993621
	Lagrange multiplier	0.492917	0.482629
	Robust Lagrange multiplier	0.000606529	0.980352
Myiarchus crinitus	Moran's I	7.33397	2.23377e-13
	Lagrange multiplier	0.299651	0.584101
	Robust Lagrange multiplier	10.9971	0.000912545
	Lagrange multiplier	0.883747	0.347177
	Robust Lagrange multiplier	11.5812	0.00066622
Setophaga striata	Moran's I	6.97942	2.96407e-12
	Lagrange multiplier	0.408164	0.522903
	Robust Lagrange multiplier	4.03709	0.0445106
	Lagrange multiplier	0.925325	0.336081
	Robust Lagrange multiplier	4.55425	0.0328372
Atlapetes pallidinu	Moran's I	8.63349	0
	Lagrange multiplier	0.475234	0.490589
	Robust Lagrange multiplier	0.774891	0.378708
	Lagrange multiplier	0.568071	0.451026
	Robust Lagrange multiplier	0.867728	0.351585
Progne tapera	Moran's I	5.6209	1.89965e-08
	Lagrange multiplier	0.835374	0.360723
	Robust Lagrange multiplier	4.25384	0.0391617
	Lagrange multiplier	1.27706	0.258446
	Robust Lagrange multiplier	4.69552	0.0302413
Catharus minimus	Moran's I	5.21374	1.85067e-07
	Lagrange multiplier	1.8905	0.169145
	Robust Lagrange multiplier	21.4835	3.56893e-06
	Lagrange multiplier	5.8904	0.0152236
	Robust Lagrange multiplier	25.4834	4.46215e-07
Diglossa lafresnayi	Moran's I	7.67788	1.62093e-14
	Lagrange multiplier	0.918022	0.337995
	Robust Lagrange multiplier	14.7375	0.000123564
	Lagrange multiplier	2.38911	0.122183
	Robust Lagrange multiplier	16.2086	5.67364e-05
Myiothlypis nigrocr	Moran's I	6.44164	1.1819e-10
	Lagrange multiplier	0.570309	0.450136
	Robust Lagrange multiplier	0.202806	0.652465
	Lagrange multiplier	0.622605	0.430081
	Robust Lagrange multiplier	0.255102	0.613505
Falco columbarius	Moran's I	12.2553	0
	Lagrange multiplier	0.361087	0.547903
	Robust Lagrange multiplier	16.004	6.32072e-05
	Lagrange multiplier	1.32232	0.250176
	Robust Lagrange multiplier	16.9653	3.80696e-05
Scytalopus griseico	Moran's I	7.12901	1.01097e-12
	Lagrange multiplier	0.641962	0.423001
	Robust Lagrange multiplier	4.32097	0.0376455
	Lagrange multiplier	1.24728	0.264072
	Robust Lagrange multiplier	4.92629	0.0264511
Empidonax alnorum	Moran's I	8.56236	0
	Lagrange multiplier	0.670034	0.41304
	Robust Lagrange multiplier	6.21196	0.012689
	Lagrange multiplier	1.11748	0.290462
	Robust Lagrange multiplier	6.65941	0.00986337
Elaenia flavogaster	Moran's I	7.235	4.65628e-13
	Lagrange multiplier	0.371931	0.541954
	Robust Lagrange multiplier	5.0643	0.0244236
	Lagrange multiplier	0.915281	0.338717
	Robust Lagrange multiplier	5.60765	0.0178822
Asio flammeus	Moran's I	4.19764	2.69705e-05
	Lagrange multiplier	2.03709	0.153503
	Robust Lagrange multiplier	8.88525	0.00287483
	Lagrange multiplier	7.37588	0.00661045
	Robust Lagrange multiplier	14.224	0.000162284
Arremon assimilis	Moran's I	4.34173	1.41364e-05
	Lagrange multiplier	0.862171	0.353132
	Robust Lagrange multiplier	8.00251	0.00467125
	Lagrange multiplier	2.8276	0.0926569
	Robust Lagrange multiplier	9.96794	0.0015929
Gymnomystax mexican	Moran's I	6.14247	8.12492e-10
	Lagrange multiplier	0.512521	0.47405
	Robust Lagrange multiplier	4.61457	0.0317015
	Lagrange multiplier	1.38982	0.238436
	Robust Lagrange multiplier	5.49186	0.0191052
Gallinago nobilis	Moran's I	3.83349	0.000126338
	Lagrange multiplier	0.35972	0.548662
	Robust Lagrange multiplier	3.8661	0.0492709
	Lagrange multiplier	1.32306	0.250044
	Robust Lagrange multiplier	4.82944	0.0279777
Pygochelidon cyanol	Moran's I	6.32333	2.55989e-10
	Lagrange multiplier	0.635278	0.425426
	Robust Lagrange multiplier	0.93404	0.333815
	Lagrange multiplier	0.515669	0.472695
	Robust Lagrange multiplier	0.81443	0.366814
Megascops choliba	Moran's I	7.93035	2.22045e-15
	Lagrange multiplier	0.859864	0.353777
	Robust Lagrange multiplier	12.5109	0.000404588
	Lagrange multiplier	2.39869	0.121437
	Robust Lagrange multiplier	14.0497	0.000178041
Egretta thula	Moran's I	4.33082	1.48554e-05
	Lagrange multiplier	0.614921	0.432941
	Robust Lagrange multiplier	1.23594	0.266254
	Lagrange multiplier	1.67955	0.194984
	Robust Lagrange multiplier	2.30057	0.129326
Egretta caerulea	Moran's I	5.06117	4.16684e-07
	Lagrange multiplier	0.442655	0.505844
	Robust Lagrange multiplier	3.74863	0.0528509
	Lagrange multiplier	0.965467	0.325813
	Robust Lagrange multiplier	4.27144	0.0387581
Penelope montagnii	Moran's I	6.0085	1.87244e-09
	Lagrange multiplier	0.651072	0.41973
	Robust Lagrange multiplier	3.77285	0.0520908
	Lagrange multiplier	1.64055	0.20025
	Robust Lagrange multiplier	4.76233	0.0290892
Amazona ochrocephal	Moran's I	2.55263	0.0106912
	Lagrange multiplier	0.529685	0.466739
	Robust Lagrange multiplier	5.22795	0.0222268
	Lagrange multiplier	2.87582	0.0899192
	Robust Lagrange multiplier	7.57408	0.00592136
Geothlypis philadel	Moran's I	6.36526	1.94959e-10
	Lagrange multiplier	0.728683	0.39331
	Robust Lagrange multiplier	11.3949	0.000736453
	Lagrange multiplier	2.02034	0.155205
	Robust Lagrange multiplier	12.6866	0.000368291
Chordeiles minor	Moran's I	3.28016	0.00103748
	Lagrange multiplier	2.10103	0.1472
	Robust Lagrange multiplier	6.99513	0.00817316
	Lagrange multiplier	4.37801	0.0364055
	Robust Lagrange multiplier	9.27211	0.00232669
Columbina talpacoti	Moran's I	9.08342	0
	Lagrange multiplier	0.439172	0.507523
	Robust Lagrange multiplier	0.465604	0.495017
	Lagrange multiplier	0.508449	0.475811
	Robust Lagrange multiplier	0.534881	0.464562
Falco peregrinus	Moran's I	20.2545	0
	Lagrange multiplier	0.419831	0.517021
	Robust Lagrange multiplier	26.2062	3.06842e-07
	Lagrange multiplier	1.81227	0.178236
	Robust Lagrange multiplier	27.5986	1.49286e-07
Serpophaga cinerea	Moran's I	4.72772	2.27053e-06
	Lagrange multiplier	0.764642	0.38188
	Robust Lagrange multiplier	8.38617	0.00378087
	Lagrange multiplier	2.25448	0.133228
	Robust Lagrange multiplier	9.87601	0.00167448
Eriocnemis vestita	Moran's I	19.0265	0
	Lagrange multiplier	0.443254	0.505556
	Robust Lagrange multiplier	1.52612	0.216696
	Lagrange multiplier	0.534295	0.464807
	Robust Lagrange multiplier	1.61716	0.203488
Porzana carolina	Moran's I	5.31511	1.06593e-07
	Lagrange multiplier	0.536809	0.463758
	Robust Lagrange multiplier	13.9442	0.000188322
	Lagrange multiplier	1.54752	0.213502
	Robust Lagrange multiplier	14.9549	0.000110114
Ensifera ensifera	Moran's I	9.80062	0
	Lagrange multiplier	0.402624	0.525737
	Robust Lagrange multiplier	1.1419	0.28525
	Lagrange multiplier	0.51068	0.474845
	Robust Lagrange multiplier	1.24996	0.26356
Catharus fuscescens	Moran's I	4.53171	5.85077e-06
	Lagrange multiplier	1.04004	0.307813
	Robust Lagrange multiplier	9.00855	0.0026872
	Lagrange multiplier	3.25191	0.0713405
	Robust Lagrange multiplier	11.2204	0.000809023
Henicorhina leucoph	Moran's I	5.59022	2.26782e-08
	Lagrange multiplier	0.897784	0.343377
	Robust Lagrange multiplier	7.15664	0.00746868
	Lagrange multiplier	2.85737	0.090956
	Robust Lagrange multiplier	9.11623	0.00253351
Coeligena helianthe	Moran's I	8.99886	0
	Lagrange multiplier	0.491036	0.483466
	Robust Lagrange multiplier	1.48483	0.22302
	Lagrange multiplier	0.733765	0.391665
	Robust Lagrange multiplier	1.72756	0.188722
Protonotaria citrea	Moran's I	7.47608	7.66054e-14
	Lagrange multiplier	0.31721	0.573289
	Robust Lagrange multiplier	2.24532	0.134019
	Lagrange multiplier	0.67373	0.411754
	Robust Lagrange multiplier	2.60184	0.10674
Setophaga castanea	Moran's I	2.95433	0.00313353
	Lagrange multiplier	0.352555	0.55267
	Robust Lagrange multiplier	0.0680477	0.794201
	Lagrange multiplier	0.387354	0.533694
	Robust Lagrange multiplier	0.102846	0.74844
Falco sparverius	Moran's I	2.95433	0.00313353
	Lagrange multiplier	0.352555	0.55267
	Robust Lagrange multiplier	0.0680477	0.794201
	Lagrange multiplier	0.387354	0.533694
	Robust Lagrange multiplier	0.102846	0.74844
Setophaga cerulea	Moran's I	4.39915	1.087e-05
	Lagrange multiplier	3.72524	0.0535958
	Robust Lagrange multiplier	0.0647379	0.799158
	Lagrange multiplier	3.7619	0.0524329
	Robust Lagrange multiplier	0.101398	0.750158
Empidonax traillii	Moran's I	3.0557	0.00224537
	Lagrange multiplier	0.929501	0.334993
	Robust Lagrange multiplier	1.88876	0.169342
	Lagrange multiplier	7.409e-05	0.993132
	Robust Lagrange multiplier	0.959332	0.327355
Buteo swainsoni	Moran's I	2.59483	0.0094638
	Lagrange multiplier	1.52759	0.216475
	Robust Lagrange multiplier	4.4206	0.0355076
	Lagrange multiplier	0.889818	0.345527
	Robust Lagrange multiplier	3.78283	0.0517811
Buteo brachyurus	Moran's I	2.51726	0.011827
	Lagrange multiplier	4.01235	0.0451682
	Robust Lagrange multiplier	10.7243	0.00105738
	Lagrange multiplier	1.05314	0.304784
	Robust Lagrange multiplier	7.76509	0.00532658
Machetornis rixosa	Moran's I	2.25011	0.0244422
	Lagrange multiplier	1.02258	0.311908
	Robust Lagrange multiplier	0.0528272	0.818215
	Lagrange multiplier	1.98101	0.159284
	Robust Lagrange multiplier	1.01126	0.3146
Plegadis falcinellu	Moran's I	1.46815	0.142065
	Lagrange multiplier	0.306647	0.579745
	Robust Lagrange multiplier	0.0231638	0.879032
	Lagrange multiplier	0.997311	0.317962
	Robust Lagrange multiplier	0.713828	0.398176
Pipraeidea melanono	Moran's I	2.4374	0.0147935
	Lagrange multiplier	5.63022	0.0176534
	Robust Lagrange multiplier	7.12065	0.00762012
	Lagrange multiplier	0.00017849	0.989341
	Robust Lagrange multiplier	1.4906	0.222123
Thlypopsis supercil	Moran's I	2.09727	0.0359696
	Lagrange multiplier	0.28427	0.593916
	Robust Lagrange multiplier	0.145338	0.703031
	Lagrange multiplier	0.143303	0.705019
	Robust Lagrange multiplier	0.00437089	0.947288
Catamenia analis	Moran's I	3.13496	0.00171878
	Lagrange multiplier	6.06196	0.0138124
	Robust Lagrange multiplier	4.41549	0.035614
	Lagrange multiplier	8.82827	0.00296599
	Robust Lagrange multiplier	7.1818	0.00736467
Anas andium	Moran's I	2.22412	0.0261407
	Lagrange multiplier	0.365883	0.545257
	Robust Lagrange multiplier	0.00030931	0.985968
	Lagrange multiplier	0.601456	0.438023
	Robust Lagrange multiplier	0.235883	0.627196
Vireo leucophrys	Moran's I	3.44856	0.00056358
	Lagrange multiplier	1.5925	0.20697
	Robust Lagrange multiplier	0.0799814	0.777323
	Lagrange multiplier	1.51594	0.218235
	Robust Lagrange multiplier	0.00342652	0.953321
Crotophaga ani	Moran's I	3.83588	0.00012512
	Lagrange multiplier	0.631598	0.42677
	Robust Lagrange multiplier	2.77376	0.0958208
	Lagrange multiplier	0.117314	0.731966
	Robust Lagrange multiplier	2.25948	0.132799
Elaenia parvirostri	Moran's I	2.24809	0.0245701
	Lagrange multiplier	0.999893	0.317336
	Robust Lagrange multiplier	0.877488	0.348891
	Lagrange multiplier	3.27899	0.070172
	Robust Lagrange multiplier	3.15659	0.0756212
Eriocnemis cupreove	Moran's I	2.37691	0.0174582
	Lagrange multiplier	1.92886	0.164884
	Robust Lagrange multiplier	1.92914	0.164852
	Lagrange multiplier	0.697801	0.403524
	Robust Lagrange multiplier	0.698088	0.403427
Tyranniscus uropygi	Moran's I	2.30726	0.0210406
	Lagrange multiplier	0.812645	0.367339
	Robust Lagrange multiplier	4.05331	0.0440848
	Lagrange multiplier	0.214542	0.643231
	Robust Lagrange multiplier	3.45521	0.0630529
Tyto furcata	Moran's I	2.82363	0.00474824
	Lagrange multiplier	1.61969	0.203135
	Robust Lagrange multiplier	3.47198	0.0624167
	Lagrange multiplier	0.0260301	0.871827
	Robust Lagrange multiplier	1.87832	0.170525
Myioborus ornatus	Moran's I	1.83188	0.0669693
	Lagrange multiplier	1.91817	0.166058
	Robust Lagrange multiplier	1.08821	0.296868
	Lagrange multiplier	7.17887	0.00737672
	Robust Lagrange multiplier	6.34891	0.0117454
Cathartes aura	Moran's I	3.03909	0.00237297
	Lagrange multiplier	1.32583	0.249548
	Robust Lagrange multiplier	1.8048	0.179133
	Lagrange multiplier	0.898823	0.343098
	Robust Lagrange multiplier	1.3778	0.240477
Contopus bogotensis	Moran's I	3.35025	0.00080738
	Lagrange multiplier	0.754034	0.385202
	Robust Lagrange multiplier	1.59761	0.206242
	Lagrange multiplier	0.279179	0.59724
	Robust Lagrange multiplier	1.12276	0.289326
Ampelion rubrocrist	Moran's I	2.14203	0.0321909
	Lagrange multiplier	7.91949	0.00489051
	Robust Lagrange multiplier	3.85898	0.0494805
	Lagrange multiplier	5.48428	0.0191882
	Robust Lagrange multiplier	1.42377	0.232784
Atlapetes schistace	Moran's I	1.76308	0.0778864
	Lagrange multiplier	3.05567	0.0804558
	Robust Lagrange multiplier	1.30445	0.253402
	Lagrange multiplier	1.77347	0.182953
	Robust Lagrange multiplier	0.0222516	0.88142
Paroaria nigrogenis	Moran's I	1.10047	0.271127
	Lagrange multiplier	4.78681	0.0286785
	Robust Lagrange multiplier	7.20362	0.00727568
	Lagrange multiplier	4.9465	0.0261435
	Robust Lagrange multiplier	7.36331	0.00665681
Turdus serranus	Moran's I	5.17749	2.249e-07
	Lagrange multiplier	0.583237	0.445046
	Robust Lagrange multiplier	0.455925	0.499535
	Lagrange multiplier	0.521093	0.470376
	Robust Lagrange multiplier	0.39378	0.530319
Eupsittula pertinax	Moran's I	2.05227	0.0401435
	Lagrange multiplier	0.75187	0.385885
	Robust Lagrange multiplier	0.0358139	0.8499
	Lagrange multiplier	1.18777	0.27578
	Robust Lagrange multiplier	0.471714	0.4922
Turdus ignobilis	Moran's I	3.51075	0.00044684
	Lagrange multiplier	6.18314	0.0128973
	Robust Lagrange multiplier	2.64071	0.104157
	Lagrange multiplier	8.18878	0.00421502
	Robust Lagrange multiplier	4.64635	0.0311197
