# Supplementary material for: Socioeconomic inequality shapes urban bird diversity: evidence for the luxury effect in Bogotá, Colombia
Source: Research Square preprint supplement (doi:10.21203/rs.3.rs-7716287/v1), 2025-10-03
Supplement: Supplementary file 2 [file c202d847319f051fdaa53da6.xlsx]

## Sheet: Regressions
		β1	p-value	β2	p-value	ρ	p-value	λ	p-value
Vanellus chilensis	OLS	4.38146	0	2.6e-07	0.007767
	SAR	-0.175304	0.464124	2e-07	0.032493	0.983653	0
	SEM	16.3119	0.218226	2.5e-07	0.014753			0.983538	0
Diglossa humeralis	OLS	2.53761	0	-2e-08	0.327329
	SAR	2.31906	0	-2e-08	0.354046	0.0864223	0.545546
	SEM	2.53103	0	-2e-08	0.404694			0.0641722	0.665031
Icterus chrysater	OLS	1.88878	0	0	0.789111
	SAR	1.41109	0	0	0.841429	0.25128	0.028186
	SEM	1.88794	0	0	0.858624			0.251242	0.028301
Spinus psaltria	OLS	3.44557	0	-1.3e-07	0.000185
	SAR	1.06886	0.003705	-1e-07	0.00512	0.732578	0
	SEM	3.37717	0	-1.1e-07	0.008347			0.732562	0
Phimosus infuscatus	OLS	10.4117	0	3.7e-07	0.18427
	SAR	-0.585148	0.361662	1.2e-07	0.657562	0.986801	0
	SEM	-24.9068	0.538838	6e-08	0.819674			0.986816	0
Piranga rubra	OLS	2.27292	0	-1e-08	0.595767
	SAR	2.04612	0	-1e-08	0.549473	0.101193	0.512541
	SEM	2.27556	0	-2e-08	0.524029			0.107597	0.488369
Fulica americana	OLS	7.87889	0	1.63e-06	1e-06
	SAR	-3.84606	0	1.61e-06	0	0.981816	0
	SEM	-24.9586	0.482564	1.63e-06	1e-06			0.981317	0
Ardea ibis	OLS	4.44874	0	-1.6e-07	0.011924
	SAR	1.79746	7e-06	-1.8e-07	0.006622	0.690061	0
	SEM	4.77869	0	-1.9e-07	0.008783			0.683532	0
Gallinula galeata	OLS	6.49054	0	1e-07	0.61326
	SAR	-0.119226	0.795881	1.8e-07	0.348979	0.971241	0
	SEM	8.48904	0.266705	4e-07	0.056824			0.972224	0
Setophaga fusca	OLS	5.06416	0	1.35e-06	0
	SAR	-1.91651	0.000459	9.2e-07	2e-06	0.94933	0
	SEM	0.50752	0.934425	9.4e-07	3e-06			0.950898	0
Ardea alba	OLS	3.09853	0	1e-08	0.840115
	SAR	1.5095	1.2e-05	-3e-08	0.523099	0.527502	1e-06
	SEM	3.171	0	-5e-08	0.318789			0.540551	0
Elaenia frantzii	OLS	1.87773	0	1.3e-07	0.050873
	SAR	0.361194	0.115232	1e-07	0.113421	0.772279	0
	SEM	2.37792	0	8e-08	0.223695			0.767003	0
Diglossa sittoides	OLS	1.9186	0	-4e-08	0.168376
	SAR	1.54254	0	-5e-08	0.128195	0.220397	0.011099
	SEM	1.95861	0	-5e-08	0.111234			0.222856	0.009611
Mecocerculus leucop	OLS	1.34452	0	1.6e-07	0
	SAR	-0.0107715	0.9349	1.1e-07	0	0.855109	0
	SEM	1.53014	0	1.1e-07	4e-06			0.853432	0
Thraupis episcopus	OLS	2.41965	0	-5e-08	0.012318
	SAR	2.05826	0	-6e-08	0.004284	0.170129	0.114616
	SEM	2.47038	0	-7e-08	0.003648			0.200833	0.060867
Conirostrum rufum	OLS	2.37879	0	-7e-08	0.021659
	SAR	2.42858	1e-06	-7e-08	0.021386	-0.0222547	0.917841
	SEM	2.37879	0	-7e-08	0.021576			-0.00588147	0.97776
Chrysomus icterocep	OLS	1.99298	0	9e-08	0.00093
	SAR	1.69258	4e-06	9e-08	0.001294	0.142101	0.405658
	SEM	2.00309	0	9e-08	0.001406			0.097026	0.578843
Rupornis magnirostr	OLS	6.32861	0	-2.7e-07	0.124535
	SAR	0.950172	0.028259	-4e-07	0.015294	0.961223	0
	SEM	2.61985	0.616209	-3.4e-07	0.065662			0.959347	0
Porphyrio martinica	OLS	1.41831	0	-5e-08	0.00077
	SAR	1.04343	0	-5e-08	0.000856	0.290703	0.028498
	SEM	1.43337	0	-5e-08	0.000758			0.295395	0.024762
Spinus spinescens	OLS	2.62791	0	-1e-07	0.037698
	SAR	2.42588	0	-9e-08	0.067722	0.0697308	0.261936
	SEM	2.59506	0	-9e-08	0.067314			0.0703122	0.262543
Mimus gilvus	OLS	3.44329	0	0	0.993486
	SAR	1.09801	0.007269	6e-08	0.350016	0.664009	0
	SEM	3.43126	0	1.3e-07	0.079202			0.685907	0
Elanus leucurus	OLS	2.08356	0	-7e-08	0.005137
	SAR	1.08235	9.9e-05	-6e-08	0.02388	0.511635	0.000223
	SEM	2.08742	0	-6e-08	0.032209			0.511234	0.000295
Vireo olivaceus	OLS	1.70682	0	-4e-08	0.071065
	SAR	0.356997	0.016418	-3e-08	0.123854	0.827098	0
	SEM	1.7595	0	-3e-08	0.140368			0.8223	0
Podilymbus podiceps	OLS	3.14766	0	3.9e-07	1e-06
	SAR	4.15568	0	4e-07	0	-0.239656	0.185163
	SEM	3.19849	0	3.7e-07	0			-0.26651	0.139541
Thraupis palmarum	OLS	3.64743	0	6.3e-07	0.000159
	SAR	2.8839	0	6e-07	0.000297	0.17614	0.073012
	SEM	3.66067	0	6.2e-07	0.001014			0.006483	0.954064
Catharus ustulatus	OLS	2.68751	0	-1e-07	0.002888
	SAR	2.25874	0	-1e-07	0.001863	0.184493	0.164195
	SEM	2.70738	0	-1e-07	0.002643			0.150366	0.245188
Oxyura ferruginea	OLS	2.38629	0	2.7e-07	0
	SAR	4.30139	0	3.5e-07	0	-0.720691	0
	SEM	2.21165	0	3.1e-07	0			-0.767423	0
Spatula discors	OLS	3.19509	3e-05	2.56e-06	0
	SAR	-1.99019	0.051994	2.22e-06	0	0.763195	0
	SEM	11.4862	0.119321	2.53e-06	0			0.893139	0
Synallaxis subpudic	OLS	11.6665	0	1.77e-06	0.000581
	SAR	5.75834	0.000759	1.18e-06	0.023756	0.412716	1e-06
	SEM	12.0798	0	1.02e-06	0.060902			0.407802	3e-06
Piranga olivacea	OLS	2.78978	0	2.6e-07	0.000143
	SAR	3.53266	0	2.3e-07	0.001205	-0.193941	0.087043
	SEM	2.90143	0	2.2e-07	0.006396			-0.136019	0.30945
Buteo platypterus	OLS	3.0206	0	9e-08	0.101198
	SAR	3.55027	0	1e-07	0.089094	-0.164378	0.348588
	SEM	3.01446	0	9e-08	0.078141			-0.180336	0.304625
Pyrocephalus rubinu	OLS	-0.069122	0.851665	9e-07	0
	SAR	-0.155467	0.792065	9e-07	0	0.0484318	0.851032
	SEM	-0.0666909	0.879173	9.6e-07	0			0.336803	0.149987
Tringa solitaria	OLS	2.33805	0	-2.4e-07	0
	SAR	1.96452	0	-2.3e-07	0	0.170807	0.08516
	SEM	2.30908	0	-2.3e-07	0			0.0758665	0.463557
Butorides striata	OLS	3.48752	0	-3.4e-07	0.000119
	SAR	1.88297	0.000676	-2.7e-07	0.002902	0.538712	0.001927
	SEM	3.47321	0	-3e-07	0.00146			0.567796	0.000919
Tyrannus tyrannus	OLS	1.43907	0	1e-07	0.006701
	SAR	0.602718	0.003116	1e-07	0.008083	0.520038	9e-06
	SEM	1.45089	0	1.1e-07	0.004149			0.554798	4e-06
Setophaga petechia	OLS	8.45061	0	-7e-07	0.008974
	SAR	13.4102	0	-6.8e-07	0.010816	-0.738595	0
	SEM	7.95601	0	-4.9e-07	0.047667			-0.720359	0
Nycticorax nycticor	OLS	1.89583	0	-7e-08	0.033235
	SAR	3.0287	0	-4e-08	0.216245	-0.743006	0
	SEM	1.70615	0	-1e-08	0.743677			-0.755377	0
Sturnella magna	OLS	2.77558	0	-2.7e-07	0.000138
	SAR	0.984741	0.00323	-2.9e-07	3.8e-05	0.785558	0
	SEM	2.19394	0.000167	-3e-07	4e-05			0.789874	0
Quiscalus lugubris	OLS	2.5336	0	-1.6e-07	0.000403
	SAR	1.00259	0.012152	-8e-08	0.08198	0.62737	7.7e-05
	SEM	2.34037	0	-4e-08	0.469357			0.661963	0.000157
Leiothlypis peregri	OLS	8.16915	0	-7.6e-07	0.00103
	SAR	3.1657	0.000205	-8.3e-07	0.00023	0.786067	0
	SEM	8.90821	0	-9.3e-07	0.000122			0.786316	0
Nannopterum brasili	OLS	1.99415	0	1.2e-07	0.01615
	SAR	4.63932	0	1.2e-07	0.019168	-1.11692	0
	SEM	2.06658	0	1e-07	0.008812			-1.12803	0
Coccyzus americanus	OLS	4.48068	0	1.08e-06	0.003265
	SAR	8.75655	1e-06	9.5e-07	0.009817	-0.618146	0.007132
	SEM	4.67544	0	9e-07	0.011542			-0.610926	0.008116
Forpus conspicillat	OLS	1.84641	0	1e-08	0.836483
	SAR	2.5528	0	2e-08	0.582117	-0.397756	0.13408
	SEM	1.80904	0	2e-08	0.563882			-0.401032	0.131041
Pheucticus aureoven	OLS	3.01062	0	3.5e-07	0.003402
	SAR	5.99275	0	3e-07	0.013902	-0.713959	0.006162
	SEM	3.35398	0	2.4e-07	0.033915			-0.76007	0.009308
Chaetocercus mulsan	OLS	1.80423	0	-2e-08	0.456081
	SAR	0.865154	0.000155	1e-08	0.83672	0.514728	1.1e-05
	SEM	1.69796	0	6e-08	0.119395			0.588933	0
Actitis macularius	OLS	1.34083	0	0	0.939399
	SAR	1.13727	0	0	0.885901	0.167498	0.186415
	SEM	1.36421	0	0	0.903671			0.166458	0.185942
Parkesia noveborace	OLS	2.27666	0	-1.8e-07	0.025337
	SAR	3.41424	0	-8e-08	0.334326	-0.82416	2e-06
	SEM	1.925	0	-6e-08	0.393394			-0.850284	1e-06
Contopus cooperi	OLS	1.58852	0	0	0.948783
	SAR	0.418499	0.053412	0	0.956788	0.723897	0
	SEM	1.50115	0	0	0.97937			0.723838	0
Setophaga ruticilla	OLS	1.80301	0	-9e-08	0.007479
	SAR	1.98995	0	-9e-08	0.005802	-0.113158	0.523161
	SEM	1.81654	0	-1e-07	0.004091			-0.159903	0.379232
Cardellina canadens	OLS	1.3772	0	5e-08	0.051531
	SAR	2.52123	0	1.3e-07	5.6e-05	-0.878716	0.00022
	SEM	1.22331	0	1.1e-07	0			-1.00727	3.2e-05
Tringa flavipes	OLS	1.24552	0	1.6e-07	0
	SAR	0.89395	0.009274	1.3e-07	2.5e-05	0.235148	0.290489
	SEM	1.252	0	1.5e-07	2e-06			0.0405915	0.902512
Crotophaga major	OLS	6.54861	0	-7.8e-07	0.049298
	SAR	8.65253	0	-2.3e-07	0.601937	-0.602553	0.010828
	SEM	4.43107	1.5e-05	3.1e-07	0.507477			-0.784836	0.003607
Tyrannus savana	OLS	1.28887	0	1.6e-07	0.006323
	SAR	0.26005	0.329841	1.6e-07	0.004282	0.589186	1e-05
	SEM	1.16697	0	1.6e-07	0.006945			0.627422	1.3e-05
Icterus icterus	OLS	3.65849	0	-2.4e-07	0.227408
	SAR	2.5029	0.002951	-2.7e-07	0.185241	0.367181	0.104967
	SEM	3.68381	0	-3.1e-07	0.14747			0.389229	0.080916
Icterus nigrogulari	OLS	1.58202	0	-8e-08	0.08899
	SAR	1.43369	0	-8e-08	0.084731	0.124717	0.337355
	SEM	1.61354	0	-8e-08	0.087059			0.121403	0.348823
Myiodynastes luteiv	OLS	1.4843	0	-5e-08	0.219243
	SAR	1.50355	0.000128	-5e-08	0.219495	-0.0144745	0.959683
	SEM	1.48399	0	-5e-08	0.219348			-0.00768211	0.97868
Sicalis flaveola	OLS	1.35782	0	-2e-08	0.334371
	SAR	0.644757	0.000585	-1e-08	0.527939	0.530519	6.3e-05
	SEM	1.34314	0	-1e-08	0.516524			0.528683	6.5e-05
Colibri cyanotus	OLS	1.93511	0	-5e-08	0.329063
	SAR	2.18335	0	-4e-08	0.374347	-0.136779	0.271131
	SEM	1.91952	0	-4e-08	0.439111			-0.126796	0.312528
Lesbia nuna	OLS	1.68413	0	2e-08	0.763252
	SAR	1.10053	0.000634	-1e-08	0.882334	0.380169	0.040739
	SEM	1.80452	0	-2e-08	0.71331			0.394194	0.034513
Dendrocygna autumna	OLS	1.53297	0	-4e-08	0.075035
	SAR	1.61333	1e-06	-4e-08	0.077968	-0.0557069	0.801087
	SEM	1.5331	0	-4e-08	0.097718			0.00168889	0.99429
Mniotilta varia	OLS	3.24429	2e-06	8.2e-07	0.007707
	SAR	2.49685	0.040315	6.1e-07	0.147146	0.220399	0.46176
	SEM	3.33736	0.002426	7.7e-07	0.189899			0.0526201	0.91423
Pandion haliaetus	OLS	1.12321	0	7e-08	0.000169
	SAR	1.29347	0.000167	7e-08	0.000127	-0.127224	0.614661
	SEM	1.11855	0	7e-08	0.000305			0.048279	0.853746
Rallus semiplumbeus	OLS	1.13628	0	1e-08	0.788736
	SAR	0.579731	0.134562	1e-08	0.610619	0.460393	0.145838
	SEM	1.08201	0	2e-08	0.446463			0.512601	0.104775
Diglossa cyanea	OLS	1.41506	0.000117	3.3e-07	0.014476
	SAR	0.0656991	0.905051	2e-07	0.143964	0.655971	0.001257
	SEM	1.28759	0.024384	1.6e-07	0.228249			0.644732	0.002458
Anisognathus ignive	OLS	2.00954	0	-9e-08	0.019056
	SAR	1.74053	4e-06	-9e-08	0.017452	0.15113	0.449589
	SEM	2.03283	0	-1e-07	0.020282			0.149558	0.427756
Asio stygius	OLS	3.06968	0	3e-08	0.668443
	SAR	1.01978	0.035566	1.3e-07	0.072189	0.566262	1e-06
	SEM	2.28738	3.8e-05	3.2e-07	0.004111			0.652042	0
Porphyriops melanop	OLS	1.02784	0	1e-08	0.421886
	SAR	1.08177	0.001347	1e-08	0.415097	-0.0521871	0.872404
	SEM	1.02738	0	1e-08	0.417479			-0.0437273	0.89213
Tringa melanoleuca	OLS	0.810252	0.044831	8.2e-07	0
	SAR	1.66717	0.017119	9.5e-07	0	-0.347784	0.135202
	SEM	0.827583	0.018938	8.6e-07	0			-0.386721	0.107832
Vireo flavoviridis	OLS	4.77905	0	-4.5e-07	0.136253
	SAR	6.89094	0	-5.2e-07	0.083922	-0.490264	0.055972
	SEM	5.12948	0	-5.8e-07	0.04233			-0.532446	0.027667
Systellura longiros	OLS	1.65455	0	1e-07	0.155855
	SAR	1.53111	0.007558	1e-07	0.151916	0.0494024	0.812797
	SEM	1.58222	0	1.1e-07	0.155368			0.0943309	0.672796
Sicalis luteola	OLS	1.34862	0	-3e-08	0.137153
	SAR	1.45114	4.1e-05	-3e-08	0.134875	-0.0850489	0.763752
	SEM	1.34467	0	-3e-08	0.1398			-0.0735001	0.787736
Asio clamator	OLS	3.67798	0	-2.9e-07	0.167898
	SAR	2.6984	0.007327	-3.6e-07	0.099482	0.337573	0.272779
	SEM	3.81273	0	-4.3e-07	0.074119			0.417881	0.1668
Grallaria ruficapil	OLS	1.42883	0	0	0.933283
	SAR	1.58696	2.4e-05	1e-08	0.907313	-0.114224	0.66162
	SEM	1.42183	0	1e-08	0.89631			-0.115478	0.658704
Lesbia victoriae	OLS	1.83629	0	-4e-08	0.166721
	SAR	0.743077	0.000167	-4e-08	0.08961	0.568317	0
	SEM	1.66385	0	-8e-08	0.021029			0.582017	0
Sayornis nigricans	OLS	1.59992	0	-6e-08	0.032275
	SAR	1.59765	0	-6e-08	0.034316	0.00146057	0.993017
	SEM	1.6002	0	-6e-08	0.030055			-0.0148495	0.930735
Ramphocelus dimidia	OLS	1.96762	0	-1.6e-07	6.1e-05
	SAR	0.838202	0.0014	-7e-08	0.092207	0.556498	3e-06
	SEM	1.59898	0	-4e-08	0.432618			0.606762	0
Pitangus sulphuratu	OLS	1.66035	0	-5e-08	0.476812
	SAR	0.730173	0.077438	0	0.977079	0.504256	0.016231
	SEM	1.30131	0	8e-08	0.352651			0.58941	0.002296
Pheucticus ludovici	OLS	1.98648	0	-2.5e-07	0.057263
	SAR	1.27629	0.002915	-2.5e-07	0.055498	0.521614	0.021703
	SEM	2.02565	0	-2.3e-07	0.069024			0.500272	0.029404
Riparia riparia	OLS	1.48999	0	2e-08	0.804221
	SAR	2.10912	0.00015	-1e-08	0.858079	-0.349524	0.237541
	SEM	1.63773	0	-4e-08	0.624775			-0.40476	0.183854
Cissopis leverianus	OLS	6.22934	0	-3.4e-07	0.269396
	SAR	9.11726	1.6e-05	-4.3e-07	0.167621	-0.44762	0.139937
	SEM	6.63955	0	-4.4e-07	0.12029			-0.489533	0.105108
Hirundo rustica	OLS	1.12309	0.000477	-4e-08	0.798529
	SAR	1.40684	0.005123	-3e-08	0.840796	-0.297934	0.467591
	SEM	1.09889	0.000538	-3e-08	0.839772			-0.297921	0.467422
Contopus sordidulus	OLS	6.19339	0	-7.4e-07	0.001551
	SAR	9.10752	2e-06	-8.6e-07	0.000341	-0.616163	0.105681
	SEM	6.25554	0	-7.5e-07	7.1e-05			-0.706944	0.064293
Petrochelidon pyrrh	OLS	2.14074	0	-1e-07	0.179613
	SAR	2.97705	0	-1e-07	0.136798	-0.417008	0.092587
	SEM	2.17145	0	-1e-07	0.127791			-0.424619	0.087439
Metallura tyrianthi	OLS	16.6671	0	-2.11e-06	0.018875
	SAR	17.8488	0.000228	-2.1e-06	0.018575	-0.0861355	0.777321
	SEM	16.7232	0	-2.1e-06	0.019288			-0.0341945	0.89931
Dryobates fumigatus	OLS	1.37939	0	1e-08	0.674774
	SAR	0.971895	0.000178	-1e-08	0.78944	0.366153	0.088582
	SEM	1.6501	0	-4e-08	0.381292			0.468945	0.034027
Empidonax virescens	OLS	1.59776	0	-6e-08	0.452454
	SAR	1.78829	5e-05	-7e-08	0.387214	-0.118339	0.63893
	SEM	1.70276	0	-1.1e-07	0.175926			-0.319452	0.298571
Diglossa albilatera	OLS	1.599	0	-7e-08	0.117044
	SAR	1.52997	4.4e-05	-7e-08	0.12978	0.0430958	0.847272
	SEM	1.59748	0	-7e-08	0.128937			0.00835563	0.97163
Patagioenas fasciat	OLS	1.67471	0	-3e-08	0.575272
	SAR	1.39743	0.000733	-3e-08	0.51236	0.186015	0.477007
	SEM	1.72154	0	-4e-08	0.45692			0.214699	0.416903
Myiarchus crinitus	OLS	5.68792	0	-7e-07	0.006753
	SAR	8.37864	0	-9.9e-07	0.000538	-0.469415	0.037202
	SEM	6.54964	0	-1.05e-06	0			-0.77013	0.000511
Setophaga striata	OLS	1.24089	0	-4e-08	0.05793
	SAR	1.47131	0.006539	-4e-08	0.064954	-0.209381	0.668326
	SEM	1.2353	0	-4e-08	0.071306			-0.105123	0.830702
Atlapetes pallidinu	OLS	1.46376	0	-5e-08	0.238297
	SAR	0.609232	0.105408	-3e-08	0.48088	0.552253	0.01696
	SEM	1.25027	0	-2e-08	0.580628			0.548923	0.019765
Progne tapera	OLS	2.19054	0	7e-08	0.252502
	SAR	3.0908	0	4e-08	0.567195	-0.322156	0.020247
	SEM	2.37215	0	2e-08	0.767166			-0.326876	0.022746
Catharus minimus	OLS	1.82251	0.032995	3.1e-07	0.329868
	SAR	4.37031	7e-06	6.4e-07	0.03917	-1.04517	3e-06
	SEM	1.01323	0.175308	7.7e-07	0.009891			-1.09924	0
Diglossa lafresnayi	OLS	1.45514	0	0	0.944634
	SAR	2.28057	0.000603	0	0.982833	-0.593693	0.204381
	SEM	1.43738	0	0	0.96903			-0.592951	0.204158
Myiothlypis nigrocr	OLS	1.71807	0	-6e-08	0.195432
	SAR	2.18703	2e-06	-6e-08	0.155158	-0.298207	0.280907
	SEM	1.72003	0	-6e-08	0.124886			-0.327629	0.228991
Falco columbarius	OLS	3.32684	0	-1.1e-07	0.345036
	SAR	4.01719	1e-06	-1.1e-07	0.381167	-0.258164	0.32731
	SEM	3.1809	0	-8e-08	0.487601			-0.233744	0.39884
Scytalopus griseico	OLS	1.0433	0	0	0.833546
	SAR	1.44586	0.000202	0	0.784571	-0.387189	0.299035
	SEM	1.04603	0	0	0.728539			-0.397653	0.288371
Empidonax alnorum	OLS	1.70567	0	-3e-08	0.513417
	SAR	1.89607	0	-3e-08	0.450165	-0.109556	0.49013
	SEM	1.71748	0	-3e-08	0.452735			-0.10876	0.495497
Elaenia flavogaster	OLS	1.39551	0	-2e-08	0.538253
	SAR	1.39168	0.0016	-2e-08	0.541876	0.00295758	0.992682
	SEM	1.39641	0	-2e-08	0.53822			0.0117222	0.970613
Asio flammeus	OLS	1.4118	0	1.2e-07	0.027391
	SAR	1.42904	0.000247	1.2e-07	0.029249	-0.00987363	0.962504
	SEM	1.41192	0	1.2e-07	0.031523			-0.00112161	0.99558
Arremon assimilis	OLS	0.384962	0.230751	5.2e-07	1e-05
	SAR	2.70291	0	1.5e-07	0.223909	-1.03084	0
	SEM	1.14456	0.000137	1.4e-07	0.212065			-1.04953	0
Gymnomystax mexican	OLS	1.49873	0	1.9e-07	0.013547
	SAR	1.52707	0.015486	1.9e-07	0.013169	-0.0158539	0.962784
	SEM	1.49261	0	1.9e-07	0.012641			0.0458142	0.885252
Gallinago nobilis	OLS	1.68752	0	-1.8e-07	0.005386
	SAR	0.361331	0.220128	-2e-08	0.820909	0.692746	2e-06
	SEM	0.804232	0.141091	8e-08	0.3495			0.772147	0
Pygochelidon cyanol	OLS	1.24948	0	2.2e-07	0.01349
	SAR	1.19646	0.016754	2.1e-07	0.025331	0.0349522	0.908236
	SEM	1.25048	0	2.2e-07	0.016442			0.017228	0.96111
Megascops choliba	OLS	4.41801	0	-3.2e-07	0.205099
	SAR	2.467	0.028834	-2.5e-07	0.324452	0.490094	0.022555
	SEM	4.15026	2.4e-05	-2.1e-07	0.419725			0.482997	0.027615
Egretta thula	OLS	1.54494	0	-1e-08	0.845765
	SAR	2.67522	0	0	0.95046	-0.851471	0.000322
	SEM	1.20646	0	1.1e-07	0.103205			-0.994081	4e-06
Egretta caerulea	OLS	2.79667	0.013692	1.5e-07	0.7218
	SAR	3.20056	0.040156	1.5e-07	0.713606	-0.116037	0.711702
	SEM	2.8343	0.010545	1.5e-07	0.719201			-0.113334	0.717235
Penelope montagnii	OLS	1.37186	7.1e-05	7e-08	0.609988
	SAR	1.18718	0.067308	6e-08	0.648311	0.125888	0.740305
	SEM	1.39065	6.3e-05	6e-08	0.684969			0.10207	0.800518
Amazona ochrocephal	OLS	1.61246	0	1.7e-07	0.012349
	SAR	0.635099	0.04861	6e-08	0.334718	0.523439	1e-06
	SEM	1.61372	2.1e-05	5e-08	0.502374			0.54128	0
Geothlypis philadel	OLS	0.108138	0.850529	8e-07	0.000392
	SAR	3.72629	6e-06	4.2e-07	0.050107	-1.19436	0
	SEM	1.12023	0.127305	4.2e-07	0.144403			-1.23574	0
Chordeiles minor	OLS	1.28137	0	0	0.959543
	SAR	0.757426	0.013283	0	0.948929	0.410005	0.065213
	SEM	1.28014	0	0	0.944668			0.40963	0.065242
Columbina talpacoti	OLS	5.95555	0.004122	-4e-07	0.582474
	SAR	9.94023	5.2e-05	-2e-07	0.77694	-0.988262	0.006636
	SEM	5.0622	0.006351	-1.3e-07	0.859117			-0.98912	0.006829
Falco peregrinus	OLS	5.12355	0	-4.8e-07	0.012125
	SAR	7.64213	4e-06	-5.3e-07	0.004568	-0.649497	0.097368
	SEM	5.15835	0	-4.8e-07	0.003986			-0.655492	0.094853
Serpophaga cinerea	OLS	1.04569	0	-1e-08	0.349825
	SAR	1.58411	0.012117	-1e-08	0.275522	-0.527158	0.393425
	SEM	1.04596	0	-1e-08	0.221762			-0.606973	0.331569
Eriocnemis vestita	OLS	2.61037	0	-3.3e-07	0.002042
	SAR	1.5507	0.002134	-2.4e-07	0.021141	0.442487	0.02008
	SEM	2.43354	0	-2.1e-07	0.112254			0.381791	0.119808
Porzana carolina	OLS	1.61031	0	-9e-08	0.008274
	SAR	1.04668	0.007578	-8e-08	0.0216	0.409325	0.128905
	SEM	1.61371	0	-8e-08	0.027649			0.356466	0.224358
Ensifera ensifera	OLS	1.36325	0	-7e-08	0.305637
	SAR	1.23591	0.009137	-6e-08	0.319677	0.100085	0.774441
	SEM	1.35576	0	-6e-08	0.329812			0.0724779	0.841942
Catharus fuscescens	OLS	1.15944	0	2e-08	0.734359
	SAR	0.26381	0.135974	0	0.930799	0.83696	0
	SEM	1.61929	0.007073	1e-08	0.825637			0.837086	0
Henicorhina leucoph	OLS	1.34465	0	5e-08	0.399138
	SAR	1.42362	0.040391	5e-08	0.396017	-0.0494275	0.905496
	SEM	1.35167	0	4e-08	0.404455			-0.0483938	0.905189
Coeligena helianthe	OLS	1.40912	0.000361	1.3e-07	0.110074
	SAR	0.20437	0.558876	-2e-08	0.828163	0.787293	0
	SEM	0.883164	0.375487	-6e-08	0.397239			0.794105	0
Protonotaria citrea	OLS	1.17377	0	0	0.904106
	SAR	1.36919	8e-05	1e-08	0.813835	-0.179957	0.564129
	SEM	1.15627	0	1e-08	0.770755			-0.191833	0.548032
Ampelion rubrocrist	OLS	0.910996	0	7e-08	0.009477
	SAR	2.4323	0	7e-08	0.002033	-1.32893	1e-06
	SEM	0.93152	0	7e-08	0.002625			-1.26105	4e-06
Anas andium	OLS	2.65947	0.000325	-2.4e-07	0.42579
	SAR	1.71722	0.086663	-1.2e-07	0.685542	0.381216	0.221911
	SEM	2.4355	0.004741	0	0.99964			0.42046	0.220593
Atlapetes schistace	OLS	3.36511	0.000573	2e-08	0.963745
	SAR	3.04647	0.078301	3e-08	0.953875	0.100242	0.828632
	SEM	3.32948	0.000355	7e-08	0.891717			0.12281	0.800372
Buteo brachyurus	OLS	1.45833	1e-06	7e-08	0.242187
	SAR	1.75328	1e-06	1.1e-07	0.099026	-0.259533	0.246667
	SEM	1.19166	0	1.4e-07	0.00431			-0.489606	0.03298
Buteo swainsoni	OLS	1.19209	0	-4e-08	0.047322
	SAR	1.2195	0	-4e-08	0.04047	-0.0239445	0.853326
	SEM	1.19304	0	-4e-08	0.039797			-0.0264523	0.839811
Catamenia analis	OLS	12.2729	0.001219	-1.85e-06	0.068594
	SAR	13.1962	0.001605	-1.81e-06	0.067858	-0.194293	0.664946
	SEM	12.0412	0.000768	-1.83e-06	0.068327			-0.155414	0.726571
Cathartes aura	OLS	2.96711	1e-06	-4.9e-07	0.067795
	SAR	4.0256	2.1e-05	-6.1e-07	0.023385	-0.369078	0.182983
	SEM	3.91449	0	-1.07e-06	0			-1.16974	3.8e-05
Contopus bogotensis	OLS	3.31388	0.191865	4.3e-07	0.55401
	SAR	3.3472	0.265566	4.4e-07	0.547816	-0.00930257	0.984778
	SEM	3.12402	0.200755	5e-07	0.500456			-0.115012	0.828867
Crotophaga ani	OLS	2.929	0.006675	-3.1e-07	0.463117
	SAR	3.20004	0.009966	-2.9e-07	0.483101	-0.153174	0.71013
	SEM	2.83954	0.007944	-2.8e-07	0.526835			-0.0952275	0.826101
Elaenia parvirostri	OLS	1.6079	0.000228	-7e-08	0.636068
	SAR	0.368255	0.461569	4e-08	0.790701	0.673706	0.000283
	SEM	1.18485	0.034542	9e-08	0.544231			0.683466	0.000117
Empidonax traillii	OLS	1.38524	0	-4e-08	0.458189
	SAR	2.63535	0.000195	-4e-08	0.451637	-1.00072	0.069744
	SEM	1.38433	0	-5e-08	0.432304			-1.01228	0.065401
Eriocnemis cupreove	OLS	1.30646	0	-3e-08	0.64323
	SAR	0.335612	0.156333	-2e-08	0.702552	0.747542	0
	SEM	1.19301	3e-06	-3e-08	0.654702			0.745426	0
Eupsittula pertinax	OLS	1.31065	0	-7e-08	0.325951
	SAR	2.44504	0.00029	-9e-08	0.124951	-0.91232	0.086479
	SEM	1.33378	0	-8e-08	0.083454			-0.953682	0.062999
Falco sparverius	OLS	1.72973	0.010786	-4e-08	0.872342
	SAR	2.80476	0.003393	-1e-08	0.969275	-0.753953	0.148327
	SEM	1.62049	0.000494	-2e-08	0.939818			-0.751995	0.149732
Machetornis rixosa	OLS	1.33259	0	-4e-08	0.327795
	SAR	1.78128	5e-06	-4e-08	0.348066	-0.375788	0.231323
	SEM	1.30379	0	-3e-08	0.418796			-0.349119	0.274997
Myioborus ornatus	OLS	1.8168	0	1.6e-07	0.199064
	SAR	1.6992	0.093208	1.6e-07	0.21865	0.0595434	0.902736
	SEM	1.79863	0	1.7e-07	0.20515			-0.0743609	0.887522
Paroaria nigrogenis	OLS	2.02375	0.000203	0	0.967513
	SAR	1.28738	0.114726	-1e-08	0.890514	0.37581	0.264009
	SEM	2.03437	9.8e-05	-2e-08	0.866997			0.376954	0.258981
Pipraeidea melanono	OLS	1.22699	0	-6e-08	0.50804
	SAR	0.277122	0.371738	2e-08	0.76896	0.691626	0.000198
	SEM	0.983609	0	5e-08	0.456133			0.717054	5.2e-05
Plegadis falcinellu	OLS	1.3047	0	-6e-08	0.108704
	SAR	0.520349	0.135205	-5e-08	0.191294	0.640337	0.018465
	SEM	1.21637	0	-4e-08	0.273259			0.635526	0.024426
Setophaga castanea	OLS	4.32783	0.000783	-5.7e-07	0.214679
	SAR	2.70704	0.117364	-6.6e-07	0.141281	0.52792	0.189884
	SEM	3.80609	0.013429	-4.7e-07	0.217857			0.442584	0.355443
Setophaga cerulea	OLS	1.18028	0	3e-08	0.536839
	SAR	1.21739	0.003532	3e-08	0.538462	-0.0282744	0.924504
	SEM	1.18166	0	3e-08	0.548126			-0.0119727	0.968277
Thlypopsis supercil	OLS	1.55071	0	-4e-08	0.325712
	SAR	1.65969	0.000231	-4e-08	0.302232	-0.0750931	0.798354
	SEM	1.54792	0	-4e-08	0.309817			-0.0286261	0.923559
Turdus ignobilis	OLS	2.14238	0	-2e-08	0.763908
	SAR	1.80046	0.004306	-1e-08	0.835725	0.149382	0.554542
	SEM	2.10704	0	-1e-08	0.844495			0.147691	0.559247
Turdus serranus	OLS	9.09575	8e-06	-2.8e-06	0.00126
	SAR	10.2983	5e-06	-2.94e-06	0.0002	-0.308692	0.423659
	SEM	9.47801	0	-3.07e-06	2.6e-05			-0.557203	0.116052
Tyranniscus uropygi	OLS	0.233772	0.853783	1.01e-06	0.016719
	SAR	1.99296	0.18366	1.11e-06	0.00328	-0.647885	0.061248
	SEM	0.165704	0.865353	1.04e-06	0.001716			-0.699984	0.028662
Tyto furcata	OLS	1.68903	0	-8e-08	0.101394
	SAR	0.816875	0.016943	-6e-08	0.130697	0.581907	0.001612
	SEM	1.69346	0	-9e-08	0.082427			0.616695	0.000636
Vireo leucophrys	OLS	1.24747	0	-5e-08	0.267089
	SAR	1.61151	1e-06	-5e-08	0.236986	-0.30945	0.253949
	SEM	1.26276	0	-5e-08	0.185871			-0.356278	0.197767
